# Supplementary material for: A survey-based study of Zika virus communication preferences among pregnant women in Georgia, United States
Source: PubMed Central journal article supplement (PMC5615434; doi:10.1186/s12884-017-1516-0), 2017-09-26
Supplement: 12884_2017_1516_MOESM1_ESM.pdf [file 12884_2017_1516_MOESM1_ESM.pdf]

## Public Health Communication Preferences of Pregnant Women Survey

\*\*\*Return this survey to the nurse/receptionist when complete\*\*\*

Today's Date (MM/DD/YYYY): \_\_\_\_\_

### Section 1. Healthcare experience

- 1) **Is your main prenatal provider an OB/GYN or a midwife?**  
 a) \_\_\_\_\_ OB/GYN  
 b) \_\_\_\_\_ Midwife  
 c) \_\_\_\_\_ Don't know
- 2) **Is your main prenatal provider:**  
 a) \_\_\_\_\_ Male  
 b) \_\_\_\_\_ Female
- 3) **Do you consider your prenatal provider to be your primary care doctor?**  
 a) \_\_\_\_\_ Yes  
 b) \_\_\_\_\_ No
- 4) **Is this your first pregnancy?**  
 a) \_\_\_\_\_ Yes  
 b) \_\_\_\_\_ No
- 5) **What trimester of pregnancy are you in now?**  
 a) \_\_\_\_\_ First (0 – 12 weeks)  
 b) \_\_\_\_\_ Second (13 – 27 weeks)  
 c) \_\_\_\_\_ Third (27 – 40+ weeks)  
 d) \_\_\_\_\_ Don't know

### Section 2. Zika and pregnancy

- 6) **Have you heard of Zika virus?**  
 a) \_\_\_\_\_ Yes      b) \_\_\_\_\_ No
- 7) **Has your prenatal care provider talked with you about Zika virus yet?**  
 a) \_\_\_\_\_ Yes      b) \_\_\_\_\_ No      c) \_\_\_\_\_ Don't know
- 8) **How interested are you in information about Zika infection and pregnancy?**
- |                          |                          |                          |                          |                          |
|--------------------------|--------------------------|--------------------------|--------------------------|--------------------------|
| Not interested at all    | A little interested      | Neutral                  | Interested               | Very interested          |
| <input type="checkbox"/> | <input type="checkbox"/> | <input type="checkbox"/> | <input type="checkbox"/> | <input type="checkbox"/> |
- 9) **Other than talking with your prenatal provider, where would you most likely go to find more information about Zika and pregnancy? Check all that apply.**
- a) \_\_\_\_\_ Social Media (Facebook, Twitter, etc.)  
 b) \_\_\_\_\_ My OB/GYN's practice website  
 c) \_\_\_\_\_ CDC Website  
 d) \_\_\_\_\_ Health department website  
 e) \_\_\_\_\_ My friends and family  
 f) \_\_\_\_\_ Other pregnancy-related websites (e.g. BabyCenter, What To Expect, etc.)  
 g) \_\_\_\_\_ Other (specify) \_\_\_\_\_

- 10) **If your prenatal provider wanted to give you more information about Zika during pregnancy, how would you like to get that information? Check all that apply.**
- a) \_\_\_\_\_ A "Zika virus" section on their practice website  
 b) \_\_\_\_\_ Useful links posted on their practice Facebook page  
 c) \_\_\_\_\_ Useful links distributed on their Twitter feed  
 d) \_\_\_\_\_ Text messages to me  
 e) \_\_\_\_\_ Emails to me  
 f) \_\_\_\_\_ Educational brochures  
 g) \_\_\_\_\_ Other (specify) \_\_\_\_\_

### Section 3. Vaccinations during pregnancy

- 11) **Has your prenatal provider talked with you about vaccinations during pregnancy yet?**  
 a) \_\_\_\_\_ Yes      b) \_\_\_\_\_ No      c) \_\_\_\_\_ Don't know
- 12) **How interested are you in information about vaccines during pregnancy?**

|                          |                          |                          |                          |                          |
|--------------------------|--------------------------|--------------------------|--------------------------|--------------------------|
| Not interested at all    | A little interested      | Neutral                  | Interested               | Very interested          |
| <input type="checkbox"/> | <input type="checkbox"/> | <input type="checkbox"/> | <input type="checkbox"/> | <input type="checkbox"/> |

- 13) **Other than talking with your prenatal provider, where would you most likely go to find more information about vaccines during pregnancy? Check all that apply.**
- a) \_\_\_\_\_ Social Media (Facebook, Twitter, etc.)  
 b) \_\_\_\_\_ My OB/GYN's practice website  
 c) \_\_\_\_\_ CDC Website  
 d) \_\_\_\_\_ Health department website  
 e) \_\_\_\_\_ My friends and family  
 f) \_\_\_\_\_ Other pregnancy-related websites (e.g. [www.BabyCenter.com](http://www.BabyCenter.com), [www.whattoexpect.com](http://www.whattoexpect.com) etc.)  
 g) \_\_\_\_\_ Other (specify) \_\_\_\_\_
- 14) **If your prenatal provider wanted to give you more information about vaccines during pregnancy, how would you like to get that information? Check all that apply.**
- a) \_\_\_\_\_ A "vaccines" section on their practice website  
 b) \_\_\_\_\_ Useful links posted on their practice Facebook page  
 c) \_\_\_\_\_ Useful links distributed on their Twitter feed  
 d) \_\_\_\_\_ Text messages to me  
 e) \_\_\_\_\_ Emails to me  
 f) \_\_\_\_\_ Educational brochures  
 g) \_\_\_\_\_ Other (specify) \_\_\_\_\_

### Section 4. Safe medications and pregnancy

- 15) **Have you talked to your prenatal provider about safe medications during pregnancy?**  
 a) \_\_\_\_\_ Yes      b) \_\_\_\_\_ No      c) \_\_\_\_\_ Don't know

16) How interested are you in information about safe medications during pregnancy?

|                          |                          |                          |                          |                          |
|--------------------------|--------------------------|--------------------------|--------------------------|--------------------------|
| Not interested at all    | A little interested      | Neutral                  | Interested               | Very interested          |
| <input type="checkbox"/> | <input type="checkbox"/> | <input type="checkbox"/> | <input type="checkbox"/> | <input type="checkbox"/> |

17) Other than talking with your prenatal provider, where would you most likely go to find more information about safe medications during pregnancy? Check all that apply.

- a)  Social Media (Facebook, Twitter, etc.)
- b)  My OB/GYN's practice website
- c)  CDC Website
- d)  Health department website
- e)  My friends and family
- f)  Other pregnancy-related websites (e.g. BabyCenter, What To Expect, etc.)
- g)  Other (specify) \_\_\_\_\_

**Section 5. Practice website & social media knowledge**

19) Do you have any social media accounts? Please check all that apply.

- a)  Facebook
- b)  Twitter
- c)  Instagram
- d)  Other (specify) \_\_\_\_\_

20) Do you know if your prenatal provider has a practice website?

- a)  Yes, and I visit it regularly
- b)  Yes, but I don't visit often
- c)  Yes, but I have never visited it
- d)  No, I don't know

18) If your prenatal provider wanted to give you more information about safe medications during pregnancy, how would you like to get that information? Check all that apply.

- a)  A "Safe medications" section on their practice website
- b)  Useful links posted on their practice Facebook page
- c)  Useful links distributed on their Twitter feed
- d)  Text messages to me
- e)  Emails to me
- f)  Educational brochures
- g)  Other (specify) \_\_\_\_\_

21) Do you know whether your prenatal provider has a practice-sponsored Facebook page?

- a)  Yes, and I have followed/liked it
- b)  Yes, but I have not followed/liked it
- c)  No, I don't know

22) Do you know whether your prenatal provider has a practice-sponsored Twitter account?

- a)  Yes, and I follow it
- b)  Yes, but I do not follow it
- c)  No, I don't know

23) If your prenatal provider started a text message service to provide you with information about prenatal health topics, how frequently would you want to get those texts?

- a)  Twice per week
- b)  Once per week
- c)  Twice per month
- d)  Once per month
- e)  Never, I don't want that service

**Section 6. Qualities of content**

24) When reading information about pregnancy-related topics, how important do you find the following qualities?

|                                                                        | Not important            | Somewhat important       | Very important           |
|------------------------------------------------------------------------|--------------------------|--------------------------|--------------------------|
| <u>That it's endorsed or approved by the CDC</u>                       | <input type="checkbox"/> | <input type="checkbox"/> | <input type="checkbox"/> |
| <u>That it's endorsed or approved by my own prenatal care provider</u> | <input type="checkbox"/> | <input type="checkbox"/> | <input type="checkbox"/> |
| <u>That it's evidence-based</u>                                        | <input type="checkbox"/> | <input type="checkbox"/> | <input type="checkbox"/> |
| <u>That it's brief</u>                                                 | <input type="checkbox"/> | <input type="checkbox"/> | <input type="checkbox"/> |
| <u>That it's important to other mothers</u>                            | <input type="checkbox"/> | <input type="checkbox"/> | <input type="checkbox"/> |

**Section 7. Demographic information**

25) How old are you?

- a)  18 – 24 years old
- b)  25 – 29 years old
- c)  30 – 34 years old
- d)  35 – 39 years old
- e)  40+ years old

26) What is the highest level of school that you have completed?

- a)  K-8 grade
- b)  9-11 grade
- c)  High school graduate/GED
- d)  Technical/Vocational or Associates
- e)  Bachelor Degree
- f)  Master's Degree
- g)  Doctorate

27) How would you describe your ethnic background?

- a)  African American/Black
- b)  Hispano/Latino/Chicano
- c)  Caucasian/White
- d)  Asian
- e)  Other (please specify) \_\_\_\_\_

\*THANK YOU FOR COMPLETING  
OUR SURVEY!\*

PLEASE RETURN YOUR SURVEY  
TO THE FRONT DESK
